# Supplementary material for: Pharmacological Treatments of Non-Substance-Withdrawal Delirium: A Systematic Review of Prospective Trials
Source: Atypon-hosted journal article supplement (doi:10.1176/appi.ajp.2013.13040458), 2013-12-20
Supplement: 151_ds003.pdf [file 151_ds003.pdf]

## Trial Results

**Table S1: Antipsychotic treatment trials for the prevention of delirium (reference numbers refer to references listed at the end of this document).**

RD=Risk Model for Delirium (66), DSM-IV=Diagnostic and Statistical Manual of Mental Disorders, 4th ed (71), IV=intravenous, NS=normal saline, ICU=intensive care unit, CAM-ICU=Confusion Assessment Method for The ICU (72), LOS=length of stay, DSM-III-R=Diagnostic and Statistical Manual of Mental Disorders, 3rd ed., revised (73), DRS-R-98=Delirium Rating Scale-Revised-98 (74), CAM=Confusion Assessment Method (75), ICDSC=Intensive Care Delirium Screening Checklist (76).

Note: All reported differences were statistically significant, unless stated otherwise.

| Study                         | Intervention                                                                                                                                                                                                                                                                     | Study Subjects                                                                                                                                                                                                                         | Number of Subjects Randomized And Received Intervention | Study Design                                                                                              | Intervention Group Imbalances                                                                                                                                                                                                                                                                         | Method for Diagnosing Delirium | Delirium Risk Prediction Model | How Delirium Episode Resolution Was Determined | Method for Assessing Delirium Severity | Delirium Specific Outcomes                                                                                                                                                                                                                                                                                                                                                                                                                                                                          | Delirium Non-Specific Outcomes                                                                                                                                                                                                                                                                                                                                    |
|-------------------------------|----------------------------------------------------------------------------------------------------------------------------------------------------------------------------------------------------------------------------------------------------------------------------------|----------------------------------------------------------------------------------------------------------------------------------------------------------------------------------------------------------------------------------------|---------------------------------------------------------|-----------------------------------------------------------------------------------------------------------|-------------------------------------------------------------------------------------------------------------------------------------------------------------------------------------------------------------------------------------------------------------------------------------------------------|--------------------------------|--------------------------------|------------------------------------------------|----------------------------------------|-----------------------------------------------------------------------------------------------------------------------------------------------------------------------------------------------------------------------------------------------------------------------------------------------------------------------------------------------------------------------------------------------------------------------------------------------------------------------------------------------------|-------------------------------------------------------------------------------------------------------------------------------------------------------------------------------------------------------------------------------------------------------------------------------------------------------------------------------------------------------------------|
| Vochteloo et al. 2011 (66)    | Hip fracture patients with a high risk for developing delirium were treated with prophylactic haloperidol 1 mg twice daily and a group of geriatric hip fracture patients with a low risk for developing delirium received no treatment.                                         | Two groups of geriatric hip fracture patients (age>65):<br>1) At high risk for developing delirium (RD score≥5), and<br>2) at low risk for developing delirium (RD score<5).<br>Prevalence rates of delirium at baseline not reported. | Haloperidol (N) = 205<br>No Treatment (N) = 173         | Non-random assignment, open label, parallel two arm, no treatment comparator trial. Fixed dosing regimen. | Many                                                                                                                                                                                                                                                                                                  | DSM-IV                         | RD                             | Not reported                                   | Not reported                           | Larger proportion of high risk subjects receiving haloperidol diagnosed with delirium during hospitalization compared to low risk subjects receiving no treatment (42.4% versus 14.1%), p<.001                                                                                                                                                                                                                                                                                                      | 1. Higher proportion of high-risk patients treated with haloperidol had a hospital length of stay ≥ 10 days compared to the low risk patients without treatment (65.1% vs. 44.1%), p<.001.<br>2. Higher 12 month mortality rates for the high risk patients treated with haloperidol compared to the low risk patients without treatment (37% vs. 14.6%), p<.001. |
| Wang et al. 2012 (5)          | ICU patients received either an initial haloperidol 0.5 mg IV bolus or NS following non-cardiac surgery, followed by a continuous infusion of IV haloperidol 0.1 mg/hr or placebo for 12 hours. Both treatment groups received Inouye's multi-component treatment interventions. | Geriatric patients (age>65) admitted to an ICU after non-cardiac surgery. Prevalence rates of delirium at baseline not reported.                                                                                                       | Haloperidol (N) = 229<br>Placebo (N) = 228              | Randomized, double blind, placebo controlled, parallel two arm trial. Fixed dosing regimen.               | 1. Duration of surgery was significantly longer for the haloperidol treated subjects.<br>2. Total intra-operative IV infusion volume was greater for the haloperidol treated subjects compared to the placebo group.                                                                                  | CAM-ICU                        | No risk prediction model used. | Not reported                                   | Not reported                           | Smaller proportion of haloperidol treated subjects diagnosed with post-operative delirium compared to placebo treatment (15.3% vs. 23.2%), p<.05.                                                                                                                                                                                                                                                                                                                                                   | 1. Shorter ICU LOS for haloperidol treated subjects compared to the placebo group (median hours: 21.3 vs. 23), p=.024.<br>2. No differences in total hospital LOS.<br>3. No differences in 28 day all cause mortality.                                                                                                                                            |
| Prakanrattana et al. 2007 (8) | ICU patients received a single dose of oral risperidone 1 mg or placebo following elective cardiac surgery.                                                                                                                                                                      | Geriatric patients (mean age=61) who underwent elective cardiac surgery and admitted post-operatively to the ICU. Patients experiencing pre-operative delirium were excluded.                                                          | Risperidone (N) = 63<br>Placebo (N) = 63                | Randomized, double blind, placebo controlled, parallel two arm trial. Fixed dosing regimen.               | None reported                                                                                                                                                                                                                                                                                         | CAM-ICU                        | No risk prediction model used. | Not reported                                   | Not reported                           | Lower incidence of post-operative delirium in the risperidone treatment group vs. placebo treatment (11.1% vs. 31.7%), p<.01.                                                                                                                                                                                                                                                                                                                                                                       | 1. No differences in ICU LOS.<br>2. No differences in total hospital LOS.                                                                                                                                                                                                                                                                                         |
| Larsen et al. 2010 (10)       | Patients received one 5 mg dose of olanzapine or placebo prior to elective total knee- or total hip-replacement surgery and a repeat 5 mg dose of olanzapine or placebo post-operatively.                                                                                        | Geriatric patients (age≥65) scheduled for elective total knee- or total hip-replacement surgery. Prevalence rates of delirium at baseline not reported.                                                                                | Olanzapine (N) = 196<br>Placebo (N) = 204               | Randomized, double blind, placebo controlled, parallel two arm trial. Fixed dosing regimen.               | 1. Greater proportion of placebo treated subjects undergoing complex joint surgery (i.e. bilateral joint-replacement or joint-revision surgery) compared to the olanzapine group.<br>2. Greater proportion of placebo treated subjects had an ASA score of 3 compared to olanzapine treated subjects. | DSM-III-R                      | No risk prediction model used. | Not reported                                   | DRS-R-98                               | 1. Smaller proportion of olanzapine treated subjects diagnosed with post-operative delirium compared to placebo treatment (14.3% vs. 40.2%), p<.0001.<br>2. Duration of delirium episodes longer for olanzapine treated subjects compared to the placebo group (mean days: 2.2 vs.1.6), p<.05.<br>3. Severity of delirium symptoms greater for olanzapine treated subjects compared to the placebo treatment (expressed as max DRS-R-98 score on the first day of delirium: 16.44 vs. 14.5), p<.05. | Larger proportion of olanzapine treated subjects discharged to home with services compared to the placebo group (40.8% vs. 29.9%), p=.02.                                                                                                                                                                                                                         |

| Study                      | Intervention                                                                                                                                                                                                                                                                                  | Study Subjects                                                                                                                                                             | Number of Subjects Randomized And Received Intervention | Study Design                                                                                | Intervention Group Imbalances | Method for Diagnosing Delirium | Delirium Risk Prediction Model                                                                                                                                | How Delirium Episode Resolution Was Determined | Method for Assessing Delirium Severity | Delirium Specific Outcomes                                                                                                                                                                                                                                                                                                                                                                                                                                                                                  | Delirium Non-Specific Outcomes                                                                                                    |
|----------------------------|-----------------------------------------------------------------------------------------------------------------------------------------------------------------------------------------------------------------------------------------------------------------------------------------------|----------------------------------------------------------------------------------------------------------------------------------------------------------------------------|---------------------------------------------------------|---------------------------------------------------------------------------------------------|-------------------------------|--------------------------------|---------------------------------------------------------------------------------------------------------------------------------------------------------------|------------------------------------------------|----------------------------------------|-------------------------------------------------------------------------------------------------------------------------------------------------------------------------------------------------------------------------------------------------------------------------------------------------------------------------------------------------------------------------------------------------------------------------------------------------------------------------------------------------------------|-----------------------------------------------------------------------------------------------------------------------------------|
| Kaneko et al. 1999 (6)     | ICU patients who underwent elective gastrointestinal surgery received post-operatively, either haloperidol 5 mg IV or NS daily for 5 days.                                                                                                                                                    | Geriatric ICU patients (mean age=72.8) who underwent elective gastrointestinal surgery. Prevalence rates of delirium at baseline not reported.                             | Haloperidol (N) = 40<br>Placebo (N) = 40                | Randomized, double blind, placebo controlled, parallel two arm trial. Fixed dosing regimen. | None reported                 | Not reported                   | No risk prediction model used.                                                                                                                                | Not reported                                   | Not reported                           | <ol style="list-style-type: none"> <li>1. Smaller proportion of haloperidol treated subjects diagnosed with post-operative delirium compared to placebo treatment (10.5% vs. 32.5%), p&lt; .05.</li> <li>2. Duration of delirium episodes shorter in haloperidol treated subjects compared to the placebo group (data and p-value not reported).</li> <li>3. Severity of delirium symptoms lesser in haloperidol treated subjects compared to the placebo group (data and p-value not reported).</li> </ol> | Not reported                                                                                                                      |
| Kalisvaart et al. 2005 (7) | Patients undergoing acute or elective hip surgery at intermediate or high risk for post-operative delirium received oral haloperidol 0.5 mg three times daily or placebo started on admission (permitted maximum delay to surgery = 72 hours), and continued for three days post-operatively. | Geriatric patients (age>70) admitted for acute or elective hip surgery at intermediate or high risk for post-operative delirium. Patients with baseline delirium excluded. | Haloperidol (N) = 212<br>Placebo (N) = 218              | Randomized, double blind, placebo controlled, parallel two arm trial. Fixed dosing regimen. | None reported                 | DSM-IV and CAM                 | Inouye predictive model for delirium (1993;1996).                                                                                                             | Not reported                                   | DRS-R-98                               | <ol style="list-style-type: none"> <li>1. No difference in incidence of post-operative delirium between haloperidol and placebo treated groups.</li> <li>2. Duration of delirium episodes shorter in the haloperidol treated group compared to the placebo group (mean days: 5.4 vs. 11.8), p&lt;.001.</li> <li>3. Severity of delirium symptoms lesser in the haloperidol treated group compared to placebo treatment (expressed as highest DRS-R-98 score:14.40 vs.18.41), p&lt;.001.</li> </ol>          | Total hospital LOS shorter for haloperidol treated subjects compared to the placebo treatment (mean days:17.1 vs. 22.6), p<.001   |
| Hakim et al. 2012 (9)      | ICU patients with subsyndromal delirium received 0.5 mg oral risperidone or placebo every 12 hours following on pump cardiac surgery and continuing for 24 hours after resolution of subsyndromal delirium or a diagnosis of "possibly delirious" was achieved.                               | Geriatric (age>65) ICU patients with subsyndromal delirium (ICDSC score of 1-3) following on pump cardiac surgery. Patients with baseline delirium excluded.               | Risperidone (N) = 51<br>Placebo (N) = 50                | Randomized, double blind, placebo controlled, parallel two arm trial. Fixed dosing regimen. | None reported                 | ICDSC>3 and DSM-IV             | No formal risk prediction model used. However, all subjects at elevated risk for delirium by carrying a diagnosis of Subsyndromal delirium (ICDSC score=1-3). | Not reported                                   | ICDSC                                  | <ol style="list-style-type: none"> <li>1. Lower incidence of post-operative delirium in the risperidone treated group compared to placebo treatment (13.7% vs. 34%), p&lt;.05.</li> <li>2. No differences in duration of delirium episodes.</li> <li>3. No differences in severity of delirium symptoms.</li> </ol>                                                                                                                                                                                         | <ol style="list-style-type: none"> <li>1. No differences in ICU LOS.</li> <li>2. No differences in total hospital LOS.</li> </ol> |

**Table S2: Antipsychotic trials for the treatment of acute delirium (reference numbers refer to references listed at the end of this document).**

DSM-IV=Diagnostic and Statistical Manual of Mental Disorders, 4th ed (71), IV=intravenous, ICU=intensive care unit, CAM-ICU=Confusion Assessment Method for The ICU (72), LOS=length of stay, DSM-III-R=Diagnostic and Statistical Manual of Mental Disorders, 3rd ed., revised (73), DRS-R-98=Delirium Rating Scale-Revised-98 (74), CAM=Confusion Assessment Method (75), ICDS=Intensive Care Delirium Screening Checklist (76), KPS=Karnofsky Performance Scale (77), DSM-IV-TR=Diagnostic and statistical manual of mental disorders, 4th ed., text rev (78), DRS=Delirium Rating Scale (79), AIDS=Acquired Immunodeficiency Syndrome, NA=not applicable, MDAS=Memorial Delirium Assessment Scale (80), DI=Delirium Index (81), DRS-J=Delirium Rating Scale, Japanese Version (82).

Note: All reported differences were statistically significant, unless stated otherwise.

| Study                     | Intervention                                                                                                                                                                                                                                                                                                                                                                     | Study Subjects                                                                                                                                                                                                                                                                 | Number of Subjects Randomized And Received Intervention          | Study Design                                                                                           | Intervention Group Imbalances                                                                                                                                                                                                                                     | Method for Diagnosing Delirium | How Delirium Episode Resolution Was Determined | Method for Assessing Delirium Severity | Delirium Specific Outcomes                                                                                                                                                                                                                                                                                                                                                        | Delirium Non-Specific Outcomes                                                                                                                                                                                                                                                                    |
|---------------------------|----------------------------------------------------------------------------------------------------------------------------------------------------------------------------------------------------------------------------------------------------------------------------------------------------------------------------------------------------------------------------------|--------------------------------------------------------------------------------------------------------------------------------------------------------------------------------------------------------------------------------------------------------------------------------|------------------------------------------------------------------|--------------------------------------------------------------------------------------------------------|-------------------------------------------------------------------------------------------------------------------------------------------------------------------------------------------------------------------------------------------------------------------|--------------------------------|------------------------------------------------|----------------------------------------|-----------------------------------------------------------------------------------------------------------------------------------------------------------------------------------------------------------------------------------------------------------------------------------------------------------------------------------------------------------------------------------|---------------------------------------------------------------------------------------------------------------------------------------------------------------------------------------------------------------------------------------------------------------------------------------------------|
| Girard et al. 2010 (11)   | Mechanically ventilated ICU patients "with an abnormal level of consciousness" received a starting dose of either: haloperidol 5 mg, ziprasidone 40 mg, or placebo via gastric access or IM every 6 hours with flexible dosing based on clinical judgment. Study drug was discontinued when subjects were delirium or coma free for 48 hours or treated to a maximum of 14 days. | Middle aged (median=53.7) mechanically ventilated medical and surgical ICU patients with "an abnormal level of consciousness or were receiving sedative or analgesic medications". 47.5 % of subjects were delirious at baseline, 34.6% of subjects were comatose at baseline. | Haloperidol (N) = 35<br>Ziprasidone (N) = 30<br>Placebo (N) = 36 | Randomized, double blind, placebo controlled, parallel three arm trial. Flexible dosing regimen.       | No                                                                                                                                                                                                                                                                | CAM-ICU                        | Not reported                                   | Not reported                           | 1. No differences in proportion of subjects experiencing resolution of delirium between haloperidol, ziprasidone and placebo treatment groups (69% vs. 77% vs. 58%), p=0.28.<br>2. No differences in duration of delirium episodes.                                                                                                                                               | 1. No differences in ICU LOS.<br>2. No differences in total hospital LOS.<br>3. No differences in hospital mortality rates.<br>4. No differences in time on ventilatory support.                                                                                                                  |
| Devlin et al. 2010 (16)   | Delirious ICU patients received a starting dose of quetiapine 50 mg or placebo enterally every 12 hours. Subsequent dosing was flexible to a maximum of 200 mg of quetiapine every 12 hrs based on subject's clinical status. Study drug was continued until subjects were delirium free, they were discharge from the ICU or to a maximum of 10 days of treatment.              | Geriatric (mean age=63) delirious (ICDSC>4) medical and surgical ICU patients.                                                                                                                                                                                                 | Quetiapine (N) = 18<br>Placebo (N) = 18                          | Randomized, double-blind, placebo controlled, parallel two arm trial. Flexible dosing regimen.         | 1. Prior to ICU admission 67% of quetiapine treated subjects and 50% placebo treated subjects came from home.<br>2. 24 hours prior to randomization mean Fentanyl dose received by the quetiapine treated group = 0 µg and by the placebo treated group = 520 µg. | ICDSC≥4                        | When an ICDSC score≤3 was first detected.      | ICDSC                                  | 1. During the period of study drug administration delirium resolved at least once in 100% of quetiapine treated compared to 78% of placebo treated subjects (p=.05).<br>2. No differences in proportion of subjects with delirium recurrence.<br>3. Median time in state of delirium shorter in the quetiapine treated compared to placebo group (36 hrs versus 120 hrs), p=.006. | 1. No differences in ICU LOS.<br>2. No differences in total hospital LOS.<br>3. No differences in hospital mortality rates.<br>4. Trend level greater proportion of quetiapine treated subjects discharged home or to a rehabilitation center compared to the placebo group (89% vs. 56%), p=.06. |
| Tahir et al. 2010 (40)    | Delirious patients received oral quetiapine 25 mg once daily or placebo with dose titration to a maximum daily dose of 175 mg of quetiapine or placebo in divided doses based on subjects' clinical status until resolution of delirium or a maximum of 10 days treatment.                                                                                                       | Geriatric (mean age=84.2) delirious general medical, surgical and orthopedic patients.                                                                                                                                                                                         | Quetiapine (N) = 21<br>Placebo (N) = 21                          | Randomized, double blind, placebo controlled, parallel two arm trial. Flexible dosing regimen.         | No                                                                                                                                                                                                                                                                | DSM-IV and DRS-R-98>15         | DRS-R-98 total score<15                        | DRS-R-98                               | 1. No differences in proportion of subjects experiencing resolution of delirium between quetiapine and placebo treatment groups.<br>2. Trend level more rapid rate of decrease of DRS-R-98 total score for quetiapine treated subjects compared to placebo treatment (Rate diff=0.55, p=.05).                                                                                     | Not reported                                                                                                                                                                                                                                                                                      |
| Boettger et al. 2011 (12) | Delirious cancer patients treated with either aripiprazole or haloperidol with a flexible dosing regimen on the basis of subjects' clinical status.                                                                                                                                                                                                                              | Geriatric (mean age=66.8) delirious cancer patients referred to psychiatry service for treatment of delirium.                                                                                                                                                                  | Aripiprazole (N) = 21<br>Haloperidol (N) = 21                    | Non-random assignment, open label, parallel two arm, active comparator trial. Flexible dosing regimen. | The mean KPS score at baseline was significantly higher in aripiprazole treated subjects (28.1) compared to the haloperidol group (22.4).                                                                                                                         | DSM-IV-TR                      | MDAS<10                                        | MDAS                                   | 1. Similar proportions of aripiprazole vs. haloperidol treated groups experienced delirium resolution over 4-7 days (76.2% vs. 76.2%).<br>2. Delirium severity decreased significantly and similarly for aripiprazole vs. haloperidol (Mean MDAS decrease: 9.8 vs 13.1) diff p=ns.                                                                                                | Not reported                                                                                                                                                                                                                                                                                      |

| Study                         | Intervention                                                                                                                                                                                           | Study Subjects                                                                                                                                                                                         | Number of Subjects Randomized And Received Intervention             | Study Design                                                                                           | Intervention Group Imbalances                                                                                                                                                                                                                                              | Method for Diagnosing Delirium  | How Delirium Episode Resolution Was Determined           | Method for Assessing Delirium Severity | Delirium Specific Outcomes                                                                                                                                                                                                                                                                                                                                                  | Delirium Non-Specific Outcomes                                                                           |
|-------------------------------|--------------------------------------------------------------------------------------------------------------------------------------------------------------------------------------------------------|--------------------------------------------------------------------------------------------------------------------------------------------------------------------------------------------------------|---------------------------------------------------------------------|--------------------------------------------------------------------------------------------------------|----------------------------------------------------------------------------------------------------------------------------------------------------------------------------------------------------------------------------------------------------------------------------|---------------------------------|----------------------------------------------------------|----------------------------------------|-----------------------------------------------------------------------------------------------------------------------------------------------------------------------------------------------------------------------------------------------------------------------------------------------------------------------------------------------------------------------------|----------------------------------------------------------------------------------------------------------|
| Grover et al. 2011 (41)       | Delirious general hospital patients received flexible dosing (based on clinician judgment) of either: haloperidol, risperidone or olanzapine. Duration of treatment dependent upon clinician judgment. | Middle aged (mean age=45.3) hospitalized delirious patients referred to the Psychiatry Consultation service for treatment of delirium.                                                                 | Haloperidol (N) = 20<br>Risperidone (N) = 21<br>Olanzapine (N) = 23 | Randomized, single blind, parallel three arm, active comparators trial. Flexible dosing regimen.       | Mean duration of delirium prior to enrollment; haloperidol (41.71 hours), olanzapine (64 hours), risperidone (77.2 hours).                                                                                                                                                 | DRS-R-98 and CAM                | Not reported                                             | DRS-R-98                               | Delirium severity decreased significantly and similarly for haloperidol, risperidone and olanzapine treatment groups (mean DRS-R-98 decrease from day 0-6: 15.33 vs. 15.47 vs. 11.05, diff p=ns).                                                                                                                                                                           | Not reported                                                                                             |
| Skrobik et al. 2004 (13)      | Delirious ICU patients received a flexible dosing regimen (based on clinician judgment) of either olanzapine (mean=4.5 mg/day) or haloperidol (mean=6.5 mg/day).                                       | Geriatric (mean age=64.9) delirious patients in a medical-surgical ICU.                                                                                                                                | Haloperidol (N) = 45<br>Olanzapine (N) = 28                         | Randomized, single blind, parallel two arm, active comparators trial. Flexible dosing regimen.         | 1. Trend towards olanzapine treated patients being older (mean age=67.5) than haloperidol treated patients (mean age=63.2).<br>2. Trend towards more surgical urgent admissions for the haloperidol treated group (37.8) compared to the olanzapine treated group (14.2%). | ICDSC <sub>≥</sub> 4 and DSM-IV | Not reported                                             | DI                                     | Delirium severity decreased significantly and similarly for haloperidol and olanzapine treatment groups (DI change score day 1-5: data not available, diff p=ns).                                                                                                                                                                                                           | Amount of IV rescue haloperidol used was equivalent between haloperidol and olanzapine treatment groups. |
| Han et al. 2004 (42)          | Delirious general hospital patients received flexible dosing haloperidol (mean= 1.71 mg/day) or risperidone (mean=1.02 mg/day) for 7 days.                                                             | Geriatric (mean age = 66) delirious general hospital patients referred to the Psychiatry consultation service.                                                                                         | Haloperidol (N) = 12<br>Risperidone (N) = 12                        | Randomized, double blind, parallel two arm, active comparator trial. Flexible dosing regimen.          | No                                                                                                                                                                                                                                                                         | DSM-III-R                       | MDAS<13                                                  | MDAS                                   | 1. Non-significantly greater proportion haloperidol compared to risperidone treated subjects experiencing delirium resolution (75% vs 42%, p=.11)<br>2. No differences in duration of delirium episodes.<br>3. Delirium severity decreased significantly and similarly for haloperidol and risperidone treated subjects (MDAS change score: data not available, diff p=.14) | Not reported                                                                                             |
| Sipahimalani et al. 1998 (14) | Delirious general hospital patients received a flexible dosing regimen of either olanzapine (range=5mg to 15 mg at bed time) or haloperidol (1.5 mg to 10 mg/day).                                     | Geriatric (mean age=64) delirious general hospital patients referred to the Psychiatry Consultation service.                                                                                           | Haloperidol (N) = 11<br>Olanzapine (N) = 11                         | Non-random assignment, open label, parallel two arm, active comparator trial. Flexible dosing regimen. | No                                                                                                                                                                                                                                                                         | Not reported                    | Not reported                                             | DRS                                    | Delirium severity decreased significantly and similarly for haloperidol and olanzapine treatment groups (Defined by >50% decrease in DRS scores: 54.5% vs. 45.4%), p-not provided.                                                                                                                                                                                          | Not reported                                                                                             |
| Lee et al. 2005 (43)          | Delirious hospitalized patients received a flexible dosing regimen (based on clinician judgment) of either amisulpride (mean=156.4 mg/day) or quetiapine (mean=113 mg/day).                            | Geriatric delirious patients (mean age=61.9) from Neurosurgery, Orthopedic Surgery, Internal Medicine, Neurology and Rehabilitation Medicine services referred to the Psychiatry consultation service. | Quetiapine (N) = 15<br>Amisulpride (N) = 16                         | Randomized, open label, parallel two arm, active comparator trial. Flexible dosing regimen.            | No                                                                                                                                                                                                                                                                         | DSM-IV                          | Not reported                                             | DRS-R-98                               | Delirium severity decreased significantly and similarly for quetiapine and amisulpride treatment groups (Average DRS-R-98 reduction: 6.6 vs. vs. 7), p=0.84.                                                                                                                                                                                                                | Not reported                                                                                             |
| Kim et al. 2010 (15)          | Delirious general hospital patients received a flexible dosing regimen (based on clinician judgment) of either risperidone (mean=0.9 mg/day) or olanzapine (mean=2.4 mg/day) for 7 days.               | Geriatric (mean age=70) delirious general hospital patients.                                                                                                                                           | Risperidone (N) = 17<br>Olanzapine (N) = 15                         | Randomized, single blind, parallel two arm, active comparator trial. Flexible dosing regimen.          | No                                                                                                                                                                                                                                                                         | DSM-IV                          | DRS-R-98 score reduction <sub>≥</sub> 50% from baseline. | DRS-R-98                               | 1. Time to response not significantly different between risperidone and olanzapine (Median days: 5 vs. 3), p=0.29.<br>2. Delirium severity decreased significantly and similarly for both treatment groups (reduction in DRS-R-98 score: data not provided), diff p=ns.                                                                                                     | Not reported                                                                                             |

| Study                      | Intervention                                                                                                                                                                                                                                                                       | Study Subjects                                                                                              | Number of Subjects Randomized And Received Intervention           | Study Design                                                                                                 | Intervention Group Imbalances | Method for Diagnosing Delirium | How Delirium Episode Resolution Was Determined | Method for Assessing Delirium Severity | Delirium Specific Outcomes                                                                                                                                                                                                                                                                                                                                                                                                                                                | Delirium Non-Specific Outcomes |
|----------------------------|------------------------------------------------------------------------------------------------------------------------------------------------------------------------------------------------------------------------------------------------------------------------------------|-------------------------------------------------------------------------------------------------------------|-------------------------------------------------------------------|--------------------------------------------------------------------------------------------------------------|-------------------------------|--------------------------------|------------------------------------------------|----------------------------------------|---------------------------------------------------------------------------------------------------------------------------------------------------------------------------------------------------------------------------------------------------------------------------------------------------------------------------------------------------------------------------------------------------------------------------------------------------------------------------|--------------------------------|
| Platt et al. 1994 (65)     | Delirious hospitalized AIDS patients received a flexible dosing regimen of either chlorpromazine or haloperidol, dosing based on DRS scores.                                                                                                                                       | Adult (age not reported) delirious hospitalized AIDS patients.                                              | Chlorpromazine (N) = 10<br>Haloperidol (N) = 10                   | Randomization and blinding not reported. Parallel two arm, active comparator trial. Flexible dosing regimen. | Not reported                  | DSM-III-R and DRS>12           | Not reported                                   | DRS                                    | "...chlorpromazine, even though sedating and anticholinergic, was at least as effective as haloperidol."<br>Neither data nor p-value reported for this comparison.                                                                                                                                                                                                                                                                                                        | Not reported                   |
| Breitbart et al. 1996 (44) | Delirious hospitalized AIDS patients treated with flexible dosing haloperidol, chlorpromazine or lorazepam to achieve DRS<13 or not hallucinating. Mean maintenance daily doses (Day 2 – end) below:<br>1. Haloperidol: 1.4 mg<br>2. Chlorpromazine: 36 mg<br>3. Lorazepam: 4.6 mg | Adult (mean age=39.2) hospitalized AIDS patients who developed incident delirium following admission.       | Haloperidol (N)=11<br>Chlorpromazine (N) =13<br>Lorazepam (N) = 6 | Randomized, double blind, parallel three arm, active comparator trial. Flexible dosing regimen.              | Not reported                  | DRS≥13<br>DSM-III-R            | DRS<13                                         | DRS                                    | 1. DRS scores decreased significantly and no differently for haloperidol compared to chlorpromazine (Mean DRS score reduction, baseline to end: (8.81 vs. 8.87)<br>2. Both haloperidol and chlorpromazine superior to lorazepam in DRS score reduction: Mean lorazepam DRS reduction=1.33.<br>3. All lorazepam treated subjects developed treatment limiting side effects necessitating early discontinuation: over-sedation, disinhibition, ataxia, increased confusion. | Not Reported                   |
| Breitbart et al. 2002 (19) | Delirious hospitalized cancer patients received a flexible dosing regimen of olanzapine (mean=3 mg/day).                                                                                                                                                                           | Geriatric (mean age=60.6) delirious cancer patients referred to the psychiatry service                      | Olanzapine (N) = 76                                               | Open label, single arm trial. Flexible dosing regimen.                                                       | NA                            | DSM-IV                         | MDAS≤10                                        | MDAS                                   | More than 75% of olanzapine treated subjects achieved delirium resolution, p= .001                                                                                                                                                                                                                                                                                                                                                                                        | Not reported                   |
| Kishi et al. 2012 (67)     | Delirious hospitalized cancer patients received a flexible dosing regimen (based on clinician judgment) of risperidone (mean=1.4 mg/day) for 7 days.                                                                                                                               | Geriatric (mean age=68.9) delirious cancer patients referred to the psychiatric consultation service.       | Risperidone (N) = 29                                              | Open label, single arm trial. Flexible dosing regimen.                                                       | NA                            | DSM-IV-TR                      | DRS-R-98 severity scale score≤10               | DRS-R-98                               | 37.9% of risperidone treated subjects achieved remission of delirium within 7 days, p=.01.                                                                                                                                                                                                                                                                                                                                                                                | Not reported                   |
| Sasaki et al. 2003 (68)    | Delirious patients received a flexible dosing regimen (based on clinician judgment) of quetiapine(mean=44.9 mg/day).                                                                                                                                                               | Geriatric (mean age=67.3) delirious general hospital patients                                               | Quetiapine (N) = 12                                               | Open label, single arm trial. Flexible dosing regimen.                                                       | NA                            | DSM-IV                         | DRS-J total score<12                           | DRS-J                                  | Mean duration of quetiapine treatment until remission of delirium = 4.8 days.                                                                                                                                                                                                                                                                                                                                                                                             | Not reported                   |
| Pae et al. 2004 (17)       | Delirious hospitalized patients received a flexible dosing regimen (based on clinician judgment) of quetiapine (mean=127 mg/day).                                                                                                                                                  | Geriatric (mean age=69.1) delirious patients from neurosurgery, orthopedic surgery and oncology departments | Quetiapine (N) = 22                                               | Open label, single arm trial. Flexible dosing regimen.                                                       | NA                            | DSM-IV                         | DRS-R-98 severity score<15                     | DRS-R-98                               | 1. 86.3% of quetiapine treated subjects achieved delirium resolution.<br>2. DRS-R-98 scores decreased from 21.8 pre-treatment to 9.3 post-treatment, p< .0001.                                                                                                                                                                                                                                                                                                            | Not reported                   |
| Kim et al. 2003 (18)       | Delirious acute medical patients received a flexible dosing regimen (based on clinician judgment) of quetiapine (mean= 93.75 mg/day).                                                                                                                                              | Geriatric (mean age=74) delirious acute medical patients                                                    | Quetiapine (N) = 12                                               | Open label, single arm trial. Flexible dosing regimen.                                                       | NA                            | DSM-IV                         | Not reported                                   | DRS                                    | Delirium severity decreased significantly over an average 5.9 day follow-up period (Mean DRS score change: 18.25 to 0.63)                                                                                                                                                                                                                                                                                                                                                 | Not reported                   |
| Parellada et al. 2004 (69) | Delirious acute medical patients received flexible dosing (According to clinician judgment) oral risperidone (mean=2.6 mg/day).                                                                                                                                                    | Geriatric (mean age=67.3) delirious acute medical patients                                                  | Risperidone (N) = 64                                              | Open label, single arm trial. Flexible dosing regimen.                                                       | NA                            | DSM-IV                         | DRS total score<13                             | DRS                                    | 1. 90.6% of risperidone treated subjects achieved remission of delirium within 72 hours.<br>2. DRS total scores reduced and average of 45.3% within 72 hours, p<.05.                                                                                                                                                                                                                                                                                                      | Not reported                   |

**Table S3: Cholinesterase inhibitor trials for the treatment of delirium (reference numbers refer to references listed at the end of this document).**

SM-IV=Diagnostic and Statistical Manual of Mental Disorders, 4th ed (71), ICU=intensive care unit, CAM-ICU=Confusion Assessment Method for The ICU (72), LOS=length of stay, CAM=Confusion Assessment Method (75), NA=not applicable, DSI=Delirium Symptom Interview (83), MDAS=Memorial Delirium Assessment Scale (80).

Note: All reported differences were statistically significant, unless stated otherwise.

| Study                      | Intervention                                                                                                                                                                                                                     | Study Subjects                                                                                                                                                                 | Number of Subjects Randomized And Received Intervention | Study Design                                                                                | Intervention Group Imbalances | Method for Diagnosing Delirium | Delirium Risk Prediction Model                                                                                                                                                                                                                    | How Delirium Episode Resolution Was Determined | Method for Assessing Delirium Severity | Delirium Specific Outcomes                                                                                                                                                                                                                                                                                                                                                          | Delirium Non-Specific Outcomes                                                                                                                                    |
|----------------------------|----------------------------------------------------------------------------------------------------------------------------------------------------------------------------------------------------------------------------------|--------------------------------------------------------------------------------------------------------------------------------------------------------------------------------|---------------------------------------------------------|---------------------------------------------------------------------------------------------|-------------------------------|--------------------------------|---------------------------------------------------------------------------------------------------------------------------------------------------------------------------------------------------------------------------------------------------|------------------------------------------------|----------------------------------------|-------------------------------------------------------------------------------------------------------------------------------------------------------------------------------------------------------------------------------------------------------------------------------------------------------------------------------------------------------------------------------------|-------------------------------------------------------------------------------------------------------------------------------------------------------------------|
| Liptzin et al. 2005 (21)   | Donepezil 5 mg daily or placebo for 14 days administered pre-operatively and continued for 14 days following surgery. The dose of donepezil was increased to 10 mg daily or matched placebo when symptoms of delirium presented. | Geriatric patients (mean age=67.2) undergoing elective total joint arthroplasty of the knee or hip. Prevalence of pre-operative delirium not reported.                         | Donepezil (N) = 39<br>Placebo (N) = 41                  | Randomized, double blind, placebo controlled, parallel two arm trial Fixed dosing regimen.  | No                            | DSM-IV, CAM and DSI            | No risk prediction model used.                                                                                                                                                                                                                    | Not reported                                   | Not reported                           | 1. No difference in proportion of donepezil treated subjects diagnosed with post-operative delirium compared to placebo.<br>2. No difference in proportion subjects diagnosed with post-operative subsyndromal delirium between treatment groups.<br>3. No differences in duration of delirium episodes.                                                                            | 1. No differences in ICU LOS.<br>2. No differences in total hospital LOS.<br>3. No differences in proportion of subjects discharged to a rehabilitation facility. |
| Zaslavsky et al. 2012 (24) | Pre-operative transdermal rivastigmine 5-cm <sup>2</sup> or placebo patch.                                                                                                                                                       | Geriatric patients (age>65) admitted for elective surgery under general anesthesia and at risk for post-operative delirium. Prevalence of pre-operative delirium not reported. | Rivastigmine (N) = 11<br>Placebo (N) = 17               | Randomized, double blind, placebo controlled, parallel two arm trial Fixed dosing regimen.  | No                            | CAM                            | Presence of at least <u>one</u> of five predictive factors:<br>(1) preoperative cognitive impairment,<br>(2) age>70 years,<br>(3) preoperative use of psychoactive drugs,<br>(4) history of prior delirium;<br>(5) severe illness or comorbidity. | Not reported                                   | Not reported                           | No difference in proportion of rivastigmine treated subjects diagnosed with post-operative delirium compared to placebo.                                                                                                                                                                                                                                                            | Not reported                                                                                                                                                      |
| Sampson et al. 2007 (22)   | Donepezil 5 mg or placebo administered immediately post-operatively and daily following surgery for three days.                                                                                                                  | Geriatric patients (mean age=67.8) undergoing elective total hip replacement. Prevalence of pre-operative delirium not reported.                                               | Donepezil (N) = 19<br>Placebo (N) = 14                  | Randomized, double blind, placebo controlled, parallel two arm trial Fixed dosing regimen.  | No                            | DSI                            | NA                                                                                                                                                                                                                                                | Not reported                                   | DSI                                    | 1. Trend level lower proportion of donepezil treated subjects diagnosed with post-operative delirium compared to placebo (9.5% vs. 35.7%), p=.08.<br>2. No differences in duration of delirium episodes.<br>3. Trend level lesser severity of delirium symptoms for donepezil treated subjects compared to placebo (by DSI scores at all time points: values not presented, p=.05). | Trend level shorter total hospital LOS for the donepezil treated subjects compared to placebo (mean days: (9.9 vs. 12.1), p=.09).                                 |
| Gamberini et al. 2009 (25) | Rivastigmine 1.5 mg every 8 hours or placebo administered starting the evening before surgery and continued until the evening of the sixth post-operative day.                                                                   | Geriatric patients (age>65) undergoing elective cardiac surgery with cardiopulmonary bypass. Baseline prevalence rates of delirium no reported.                                | Rivastigmine (N) = 59<br>Placebo (N) = 61               | Randomized, double blind, placebo controlled, parallel two arm trial. Fixed dosing regimen. | No                            | CAM                            | No risk prediction model used.                                                                                                                                                                                                                    | Not reported                                   | Not reported                           | 1. No difference in proportion of rivastigmine treated subjects diagnosed with post-operative delirium compared to placebo.<br>2. No differences in duration of delirium episodes.                                                                                                                                                                                                  | 1. No differences in ICU LOS.<br>2. No differences in total hospital LOS.                                                                                         |

| Study                        | Intervention                                                                                                                                                                                                                                                                                                     | Study Subjects                                                                                                                                                                             | Number of Subjects Randomized And Received Intervention | Study Design                                                                                | Intervention Group Imbalances                                                                                                               | Method for Diagnosing Delirium | Delirium Risk Prediction Model | How Delirium Episode Resolution Was Determined        | Method for Assessing Delirium Severity | Delirium Specific Outcomes                                                                                                                                                                                                                                                                                                                | Delirium Non-Specific Outcomes                                                                                                                                                                                                                                                                                                                                                                             |
|------------------------------|------------------------------------------------------------------------------------------------------------------------------------------------------------------------------------------------------------------------------------------------------------------------------------------------------------------|--------------------------------------------------------------------------------------------------------------------------------------------------------------------------------------------|---------------------------------------------------------|---------------------------------------------------------------------------------------------|---------------------------------------------------------------------------------------------------------------------------------------------|--------------------------------|--------------------------------|-------------------------------------------------------|----------------------------------------|-------------------------------------------------------------------------------------------------------------------------------------------------------------------------------------------------------------------------------------------------------------------------------------------------------------------------------------------|------------------------------------------------------------------------------------------------------------------------------------------------------------------------------------------------------------------------------------------------------------------------------------------------------------------------------------------------------------------------------------------------------------|
| van Eijk et al. 2010 (45)    | ICU patients received an increasing dose of rivastigmine or placebo titrated to 6 mg twice daily over 9 days, treatment continued until resolution of delirium or hospital discharge. Subjects in both treatment groups received concomitant IV haloperidol 1 mg or 2.5 mg three times daily (depending on age). | Geriatric ICU patients (mean age=69) with delirium.                                                                                                                                        | Rivastigmine (N) = 54<br>Placebo (N) = 50               | Randomized, double blind, placebo controlled, parallel two arm trial. Fixed dosing regimen. | A greater proportion of rivastigmine treated subjects (85%) compared to placebo treated subjects (64%) were emergently admitted to the ICU. | CAM-ICU                        | NA                             | CAM-ICU negative for 48 hours (2 consecutive ratings) | DSI                                    | <p>1. Trend level longer duration of delirium episodes for the rivastigmine treated subjects compared to placebo treated subjects (median days: 5 vs. 3), p= .06.</p> <p>2. Significantly greater severity of delirium symptoms for rivastigmine treated subjects compared to placebo: (median of mean DSI scores=2.3 vs. 2), p=.004.</p> | <p>1. Significantly longer ICU LOS for rivastigmine treated subjects compared to placebo (median days:15 vs. 8), p&lt;.001.</p> <p>2. Trend level longer total hospital LOS for rivastigmine treated subjects compared to placebo (median days:29 vs. 26), p=.06.</p> <p>3. Trend level higher hospital mortality rates for the rivastigmine treated subjects compared to placebo (22% vs. 8%), p=.07.</p> |
| Marcantonio et al. 2011 (23) | Donepezil 5 mg or placebo administered within 24 hours of surgery, either pre-operatively or post-operatively, and 5 mg/day of donepezil or placebo continued for 30 days or until side effects or the clinical situation required termination.                                                                  | Geriatric patients (age>70) admitted to an orthopedics for surgical repair of hip fracture. Delirium was present at baseline in 1/7 donepezil treated and in 4/9 placebo treated subjects. | Donepezil (N) = 7<br>Placebo (N) = 9                    | Randomized, double blind, placebo controlled, parallel two arm trial. Fixed dosing regimen. | Higher pre-operative prevalence of delirium in the placebo treated group (44%) compared to the donepezil treated group (14%).               | MDAS and CAM                   | No risk prediction model used. | Not reported.                                         | MDAS                                   | <p>1. No difference in incidence of post-operative delirium between donepezil and placebo treated subjects.</p> <p>2. No differences in severity of delirium symptoms.</p>                                                                                                                                                                | Not reported                                                                                                                                                                                                                                                                                                                                                                                               |

**Table S4: Treatment trials of the effects of anesthetic technique, peri-operative analgesia and, peri-operative and critical care sedation in delirium (reference numbers refer to references listed at the end of this document).**

DSM-IV=Diagnostic and Statistical Manual of Mental Disorders, 4th ed (71), IV=intravenous, ICU=intensive care unit, CAM-ICU=Confusion Assessment Method for The ICU (72), LOS=length of stay, DSM-III=Diagnostic and Statistical Manual of Mental Disorders, 3rd ed (84), DRS-R-98=Delirium Rating Scale-Revised-98 (74), CAM=Confusion Assessment Method (75), ICDS=Intensive Care Delirium Screening Checklist (76), DSM-IV-TR=Diagnostic and statistical manual of mental disorders, 4th ed., text rev (78), FICB=fascia iliaca compartment block, PCA=patient controlled analgesia, POD=postoperative day, RASS=Richmond Agitation-Sedation Scale (85).

Note: All reported differences were statistically significant, unless stated otherwise.

| Study                        | Intervention                                                                                                                                                                                                                                       | Study Subjects                                                                                                                                                                                                                       | Number of Subjects Randomized And Received Intervention       | Study Design                                                                                                                       | Intervention Group Imbalances                                                                                                             | Method for Diagnosing Delirium | Delirium Risk Prediction Model      | How Delirium Episode Resolution Was Determined | Method for Assessing Delirium Severity | Delirium Specific Outcomes                                                                                                                                                                                                                                                                                                                                                                                                                   | Delirium Non-Specific Outcomes        |
|------------------------------|----------------------------------------------------------------------------------------------------------------------------------------------------------------------------------------------------------------------------------------------------|--------------------------------------------------------------------------------------------------------------------------------------------------------------------------------------------------------------------------------------|---------------------------------------------------------------|------------------------------------------------------------------------------------------------------------------------------------|-------------------------------------------------------------------------------------------------------------------------------------------|--------------------------------|-------------------------------------|------------------------------------------------|----------------------------------------|----------------------------------------------------------------------------------------------------------------------------------------------------------------------------------------------------------------------------------------------------------------------------------------------------------------------------------------------------------------------------------------------------------------------------------------------|---------------------------------------|
| Berggren et al. 1987 (26)    | Patients undergoing surgical repair of femoral neck fracture received either epidural (prilocaine and bupivacaine if necessary) or general (halothane with thiopental induction) anesthesia.                                                       | Geriatric patients (age>64) admitted to orthopedic units with femoral neck fracture for surgical repair. 3/28 subjects receiving epidural and 2/29 subjects receiving general anesthesia were diagnosed with pre-operative delirium. | Epidural anesthesia (N) = 28<br>Halothane anesthesia (N) = 29 | Randomized, single blind, parallel two arm, active comparator trial. Dosing standardized per clinical practice.                    | Anticholinergic drugs used more frequently in the epidural compared to the halothane anesthesia group.                                    | DSM-III                        | No risk prediction model used       | Not reported                                   | Not reported                           | No difference in incidence of post-operative delirium between epidural and halothane anesthesia groups.                                                                                                                                                                                                                                                                                                                                      | No differences in total hospital LOS. |
| Papaioannou et al. 2005 (27) | Patients undergoing elective surgery received either general or regional anesthesia (epidural or spinal) with or without conscious sedation by propofol infusion.                                                                                  | Geriatric patients (age>60) undergoing elective surgery. Baseline prevalence rates of delirium not reported.                                                                                                                         | General anesthesia (N) = 28<br>Regional anesthesia (N) = 19   | Randomized, parallel two arm, active comparator trial. Dosing standardized per clinical practice. Blinding of raters not reported. | A greater proportion of general anesthesia subjects received post-operative IV analgesia compared to the local anesthesia group.          | DSM-III                        | No risk prediction model used       | Not reported                                   | Not reported                           | No difference between regional and general anesthesia groups in proportion of subjects diagnosed with post-operative delirium.                                                                                                                                                                                                                                                                                                               | No differences in total hospital LOS. |
| Mouzopoulos et al. 2009 (29) | Patients undergoing surgical repair of hip fracture received either Iliac fascia compartment block (FICB) (0.3 mL/kg bupivacaine) or placebo FICB pre-operatively and repeated once daily post-operatively until delirium occurrence or discharge. | Geriatric patients (age≥70) admitted to an orthopedic unit for surgical repair of hip fracture at intermediate or high risk for delirium. Subjects diagnosed with pre-operative delirium were excluded.                              | FICB prophylaxis (N) = 102<br>Placebo (N) = 105               | Randomized, double blind, placebo controlled, parallel two arm trial. Fixed dosing regimen.                                        | Greater amount of IM pethidine (meperidine) administered to the placebo group for peri-operative pain control compared to the FICB group. | DSM-IV and CAM                 | Inouye prediction model (1993;1996) | Not reported                                   | DRS-R-98                               | 1. Incidence of post-operative delirium "significantly" lower in the FICB group compared to the placebo group (10.78% vs. 23.8%), p-not reported.<br>2. Duration of delirium episodes significantly shorter in the FICB group compared to placebo (mean days: 5.22 versus 10.9), p<.001.<br>3. Severity of delirium symptoms significantly less in the FICB group compared to the placebo (highest DRS-R-98 value: 14.34 vs. 18.61), p<.001. | Not reported                          |



| Study                      | Intervention                                                                                                                                                                                                                                                                                                                                     | Study Subjects                                                                                                                                                                                     | Number of Subjects Randomized And Received Intervention        | Study Design                                                                                  | Intervention Group Imbalances                                                                                                 | Method for Diagnosing Delirium | Delirium Risk Prediction Model | How Delirium Episode Resolution Was Determined | Method for Assessing Delirium Severity | Delirium Specific Outcomes                                                                                                                                                                                                                                                                                                                                                                                                                                                                                                                                               | Delirium Non-Specific Outcomes                                                                                                                                                                                         |
|----------------------------|--------------------------------------------------------------------------------------------------------------------------------------------------------------------------------------------------------------------------------------------------------------------------------------------------------------------------------------------------|----------------------------------------------------------------------------------------------------------------------------------------------------------------------------------------------------|----------------------------------------------------------------|-----------------------------------------------------------------------------------------------|-------------------------------------------------------------------------------------------------------------------------------|--------------------------------|--------------------------------|------------------------------------------------|----------------------------------------|--------------------------------------------------------------------------------------------------------------------------------------------------------------------------------------------------------------------------------------------------------------------------------------------------------------------------------------------------------------------------------------------------------------------------------------------------------------------------------------------------------------------------------------------------------------------------|------------------------------------------------------------------------------------------------------------------------------------------------------------------------------------------------------------------------|
| Beaussier et al. 2006 (28) | Patients undergoing surgical resection of cancer of the left colon or rectum received pre-operatively either intrathecal morphine (300 µg) via the L4-L5 inter-space or 3ml saline injected in the subcutaneous space at the L4-L5 level. Post-operatively, both groups received IV boluses and PCA morphine for post-operative pain management. | Geriatric patients (age>70) admitted for surgical resection of cancer of left colon or rectum. Baseline prevalence rates of delirium not reported.                                                 | Intrathecal morphine + IV PCA (N) = 26<br>IV PCA only (N) = 26 | Randomized, double blind, placebo controlled, parallel two arm trial. Fixed dosing regimen.   | Daily post-operative IV PCA morphine consumption was lower in the intrathecal morphine group compared to placebo.             | CAM                            | No risk prediction model used  | Not reported                                   | Not reported                           | No difference in proportion of subjects diagnosed with post-operative delirium between the intrathecal morphine and placebo groups.                                                                                                                                                                                                                                                                                                                                                                                                                                      | No differences in total hospital LOS.                                                                                                                                                                                  |
| Leung et al, 2006 (30)     | Patients undergoing spinal surgery with general anesthesia received either gabapentin 900 mg or placebo orally 1 to 2 hours before surgery, and continued daily for the first 3 post-operative days.                                                                                                                                             | Older patients (mean age=59.6) undergoing surgery involving the spine, requiring general anesthesia. Baseline prevalence rates of delirium not reported.                                           | Gabapentin (N) = 9<br>Placebo (N) = 12                         | Randomized, double blind, placebo controlled, parallel two arm trial. Fixed dosing regimen.   | Average daily dose of hydromorphone higher on POD 1 and POD 2 for the placebo treated group compared to the gabapentin group. | CAM                            | No risk prediction model used  | Not reported                                   | Not reported                           | Proportion of gabapentin treated subjects diagnosed with post-operative delirium significantly less compared to placebo (42% vs. 0%), p<.05.                                                                                                                                                                                                                                                                                                                                                                                                                             | Not reported                                                                                                                                                                                                           |
| Riker et al. 2009 (31)     | Mechanically ventilated ICU patients received either a continuous IV infusion of a flexible dose of dexmedetomidine (0.2-1.4 µg/kg/hour) or midazolam (0.02-0.1 mg/kg/hour) titrated to achieve light sedation from enrollment until extubation or 30 days.                                                                                      | Older medical and surgical ICU patients (mean age=62) who were mechanically ventilated. 60.3% of dexmedetomidine and 59.3% of midazolam treated subjects were diagnosed with delirium at baseline. | Dexmedetomidine (N) = 244<br>Midazolam (N) = 122               | Randomized, double blind, parallel two arm, active comparator trial. Flexible dosing regimen. | No                                                                                                                            | CAM-ICU                        | No risk prediction model used  | Not reported                                   | Not reported                           | 1. Dexmedetomidine treatment in subjects delirium-free at baseline was associated with a 15.4% decrease (p=.02), with a lesser delirium prevalence for dexmedetomidine compared to midazolam (32.9% vs. 55.0%), p=.03.<br>2. The effect of dexmedetomidine in subjects with delirium at baseline was a 32.2% reduction (p<.001), with a lesser delirium prevalence for dexmedetomidine compared to midazolam (68.7% vs. 95.5%), p<.001.<br>3. Greater number of mean delirium-free days for dexmedetomidine treated subjects compared to midazolam (2.5 vs 1.7), p=.002. | 1. No differences in ICU LOS.<br>2. No differences in all cause 30 day mortality rates.<br>3. Time to extubation shorter for dexmedetomidine treated subjects compared to midazolam (median days: 3.7 vs. 5.6), p=.01. |

| Study                          | Intervention                                                                                                                                                                                                                                                                                                                                                                                                   | Study Subjects                                                                                                                                                                                                                                                                                                                                                            | Number of Subjects Randomized And Received Intervention | Study Design                                                                                  | Intervention Group Imbalances                                                                                                                                            | Method for Diagnosing Delirium                                                                                     | Delirium Risk Prediction Model                                                                                                                                              | How Delirium Episode Resolution Was Determined | Method for Assessing Delirium Severity | Delirium Specific Outcomes                                                                                                                                                                         | Delirium Non-Specific Outcomes                                                                                                                                                                                                                                                                          |
|--------------------------------|----------------------------------------------------------------------------------------------------------------------------------------------------------------------------------------------------------------------------------------------------------------------------------------------------------------------------------------------------------------------------------------------------------------|---------------------------------------------------------------------------------------------------------------------------------------------------------------------------------------------------------------------------------------------------------------------------------------------------------------------------------------------------------------------------|---------------------------------------------------------|-----------------------------------------------------------------------------------------------|--------------------------------------------------------------------------------------------------------------------------------------------------------------------------|--------------------------------------------------------------------------------------------------------------------|-----------------------------------------------------------------------------------------------------------------------------------------------------------------------------|------------------------------------------------|----------------------------------------|----------------------------------------------------------------------------------------------------------------------------------------------------------------------------------------------------|---------------------------------------------------------------------------------------------------------------------------------------------------------------------------------------------------------------------------------------------------------------------------------------------------------|
| Reade et al. 2009 (20)         | Mechanically ventilated ICU patients received either a continuous IV infusion of a flexible dose of dexmedetomidine (0.2 to 0.7 µg/kg/hour) or haloperidol (0.5 to 2 mg/hour) for as long as deemed necessary by the treating physician.                                                                                                                                                                       | Middle aged mechanical ventilation aged medical and surgical ICU patients in whom extubation was not possible solely because of agitation. 30% of dexmedetomidine and 40% of haloperidol treated patients were diagnosed with delirium at baseline. 50% of dexmedetomidine and 60% of haloperidol treated patients were diagnosed with subsyndromal delirium at baseline. | Dexmedetomidine (N) = 10<br>Haloperidol (N) = 10        | Randomized, open label, parallel two arm, active comparator trial. Flexible dosing regimen.   | 1. Median age=52 for dexmedetomidine and 68 for Haloperidol, p=.241. 2. Requiring physical restraint prior to enrollment: dexmedetomidine=80%, haloperidol=50%, p=0.160. | ICDSC score≥4                                                                                                      | No formal risk prediction model used. However, a significant proportion of subjects at elevated risk by carrying Subsyndromal delirium diagnosis (ICDSC total score of 1-3) | ICDSC score<4                                  | Not reported                           | No differences in duration of delirium episodes between dexmedetomidine treated compared to haloperidol (median hours to achieve a ICDSC score < 4 (0 vs. 0), p=.50.                               | 1. ICU LOS shorter for dexmedetomidine treated subjects compared to haloperidol (median days:4.5 vs. 6), p=.009.<br>2. No differences in hospital mortality rates.<br>3. Time to extubation shorter for dexmedetomidine treated subjects compared to haloperidol (median hours:19.9 vs. 42.2), p=.01.   |
| Pandharipande et al. 2007 (33) | Mechanically ventilated ICU patients received either IV dexmedetomidine infusion started at 0.15 µg/kg/hour and titrated to a maximum of 1.5 µg/kg/hour or lorazepam infusion started at a dose of 1 mg/hour and titrated to a maximum of 10 mg/hour to achieve the sedation goal set by the patient's medical team using the RASS. Treatment continued until extubation or for the maximum time of 120 hours. | Adult (median age=60) medical and surgical ICU patients requiring mechanical ventilation for longer than 24 hours. Baseline prevalence rates of delirium not reported.                                                                                                                                                                                                    | Dexmedetomidine (N) = 52<br>Lorazepam (N) = 51          | Randomized, double blind, parallel two arm, active comparator trial. Flexible dosing regimen. | No                                                                                                                                                                       | RASS score of minus 3 or greater (i.e., RASS -3, -2, -1, 0, etc.; i.e., responsive to verbal stimulus) and CAM-ICU | No risk prediction model used                                                                                                                                               | Not reported                                   | Not reported                           | 1. No difference in proportion of subjects diagnosed with delirium during follow-up between dexmedetomidine and lorazepam treated subjects.<br>2. No differences in duration of delirium episodes. | 1. No differences in ICU LOS.<br>2. No differences in 28 day mortality rates.<br>3. No differences in 12 month mortality rates.<br>4. No difference in ventilator free days.<br>5. Smaller proportion of dexmedetomidine treated subjects experienced coma compared to lorazepam (63% vs. 92%), p<.001. |

| Study                      | Intervention                                                                                                                                                                                                                                                                                                                                                                                                                                                                                                                                                                                                                                     | Study Subjects                                                                                                                                                                                                           | Number of Subjects Randomized And Received Intervention                        | Study Design                                                                                   | Intervention Group Imbalances | Method for Diagnosing Delirium | Delirium Risk Prediction Model | How Delirium Episode Resolution Was Determined                                   | Method for Assessing Delirium Severity | Delirium Specific Outcomes                                                                                                                                                                                                                                                                                                                    | Delirium Non-Specific Outcomes                                                                                                                                                                                                                                                                                               |
|----------------------------|--------------------------------------------------------------------------------------------------------------------------------------------------------------------------------------------------------------------------------------------------------------------------------------------------------------------------------------------------------------------------------------------------------------------------------------------------------------------------------------------------------------------------------------------------------------------------------------------------------------------------------------------------|--------------------------------------------------------------------------------------------------------------------------------------------------------------------------------------------------------------------------|--------------------------------------------------------------------------------|------------------------------------------------------------------------------------------------|-------------------------------|--------------------------------|--------------------------------|----------------------------------------------------------------------------------|----------------------------------------|-----------------------------------------------------------------------------------------------------------------------------------------------------------------------------------------------------------------------------------------------------------------------------------------------------------------------------------------------|------------------------------------------------------------------------------------------------------------------------------------------------------------------------------------------------------------------------------------------------------------------------------------------------------------------------------|
| Maldonado et al. 2009 (32) | <p>Patients who underwent elective cardiac surgery received one of three post-operative sedation protocols:</p> <ol style="list-style-type: none"> <li>1. Dexmedetomidine loading dose of 0.4 µg/kg, followed by a maintenance IV infusion ranging from 0.2 µg/kg/hour to 0.7 µg/kg/hour, continuing post-extubation as deemed clinically necessary for a maximum of 24 hours.</li> <li>2. Propofol maintenance IV infusion ranging from 25 µg/kg/minute to 50 µg/kg/minute, discontinued prior to extubation.</li> <li>3. Midazolam maintenance IV infusion ranging from 0.5 mg/hour to 2 mg/hour, discontinued prior to extubation.</li> </ol> | Mechanically ventilated older ICU patients (mean age=57.7) post elective cardiac surgery with cardiopulmonary bypass. Baseline prevalence rates of delirium not reported.                                                | <p>Dexmedetomidine (N) = 36<br/> Midazolam (N) = 32<br/> Propofol (N) = 31</p> | Randomized, open label, parallel three arm, active comparators trial. Flexible dosing regimen. | No                            | DSM-IV-TR                      | No risk prediction model used  | Not reported                                                                     | Not reported                           | <ol style="list-style-type: none"> <li>1. Lower proportion of dexmedetomidine treated subjects diagnosed with post-operative delirium compared to both propofol and midazolam (10% vs. 44% vs. 44%), p&lt;.001 (ITT analysis).</li> <li>2. No differences in duration of delirium episodes.</li> </ol>                                        | <ol style="list-style-type: none"> <li>1. No differences in ICU LOS.</li> <li>2. No differences in total hospital LOS.</li> <li>3. No differences in time to extubation.</li> </ol>                                                                                                                                          |
| Shehabi et al. 2009 (34)   | Mechanically ventilated ICU patients received post-operatively either a dexmedetomidine maintenance IV infusion ranging from 0.1 µg/kg/hour to 0.7 µg/kg/hour or a morphine maintenance infusion ranging from 10 µg/kg/hour to 70 µg/kg/hour, and was continued until subject was ready to discharge from ICU or to a maximum of 48 hours of mechanical ventilation.                                                                                                                                                                                                                                                                             | Geriatric patients (age>60) post-operative from on pump cardiac surgery (coronary artery bypass graft and/or valve replacement), mechanically ventilated in the ICU. Baseline prevalence rates of delirium not reported. | <p>Dexmedetomidine (N) = 152<br/> Morphine (N) = 147</p>                       | Randomized, double blind, parallel two arm, active comparator trial. Flexible dosing regimen.  | No                            | CAM-ICU                        | No risk prediction model used  | Delirium free for more than 24 hours = two consecutive negative CAM-ICU ratings. | Not reported.                          | <ol style="list-style-type: none"> <li>1. Trend level smaller proportion of dexmedetomidine treated subjects with post-operative delirium compared to morphine (8.6% vs. 15%), p=.08.</li> <li>2. Duration of delirium episodes shorter in the dexmedetomidine treated group compared with morphine (median days: 2 vs. 5), p=.03.</li> </ol> | <ol style="list-style-type: none"> <li>1. No differences in ICU LOS.</li> <li>2. No differences in total hospital LOS.</li> <li>3. No differences in hospital mortality rates.</li> <li>4. Shorter time to extubation for dexmedetomidine treated subjects compared to morphine (median hours: 14 vs. 15), p=.03.</li> </ol> |

**Table S5: Treatment trials of miscellaneous pharmacological agents in delirium (reference numbers refer to references listed at the end of this document).**

DSM-IV=Diagnostic and Statistical Manual of Mental Disorders, 4th ed (71), IV=intravenous, ICU=intensive care unit, LOS=length of stay, CAM=Confusion Assessment Method (75), ICDSC=Intensive Care Delirium Screening Checklist (76), MDAS=Memorial Delirium Assessment Scale (80), DRS=Delirium Rating Scale (79), NA=not applicable, CABG=coronary artery bypass graft.

Note: All reported differences were statistically significant, unless stated otherwise.

| Study                    | Intervention                                                                                                                                                                                                                                  | Study Subjects                                                                                                                                                              | Number of Subjects Randomized And Received Intervention                      | Study Design                                                                                | Intervention Group Imbalances                                                                                                                                                                                                                                                                                                                                                                                            | Method for Diagnosing Delirium | Delirium Risk Prediction Model | How Delirium Episode Resolution Was Determined | Method for Assessing Delirium Severity | Delirium Specific Outcomes                                                                                                                                                                                           | Delirium Non-Specific Outcomes                                                                                                                                                                                                                                                             |
|--------------------------|-----------------------------------------------------------------------------------------------------------------------------------------------------------------------------------------------------------------------------------------------|-----------------------------------------------------------------------------------------------------------------------------------------------------------------------------|------------------------------------------------------------------------------|---------------------------------------------------------------------------------------------|--------------------------------------------------------------------------------------------------------------------------------------------------------------------------------------------------------------------------------------------------------------------------------------------------------------------------------------------------------------------------------------------------------------------------|--------------------------------|--------------------------------|------------------------------------------------|----------------------------------------|----------------------------------------------------------------------------------------------------------------------------------------------------------------------------------------------------------------------|--------------------------------------------------------------------------------------------------------------------------------------------------------------------------------------------------------------------------------------------------------------------------------------------|
| Al-Aama et al. 2011 (39) | Acute medical patients received either 0.5 mg of oral melatonin or placebo prior to sleep daily until discharge, death or up to 14 days.                                                                                                      | Geriatric (age>65) acute medical inpatients. Baseline delirium diagnosed in 14.7% of subjects in the placebo group and 8.2% of subjects in the melatonin group.             | Melatonin (N) = 72<br>Placebo (N) = 73                                       | Randomized, double blind, placebo controlled, parallel two arm trial. Fixed dosing regimen. | No                                                                                                                                                                                                                                                                                                                                                                                                                       | CAM                            | No risk prediction model used  | Not reported                                   | MDAS                                   | 1. Lower prevalence of delirium in the melatonin treatment group compared to the placebo group. (12.0% vs. 31.0%), p<.01.<br>2. No differences in severity of delirium symptoms.                                     | 1. No differences in total hospital LOS.<br>2. No differences in hospital mortality rates.<br>3. No differences in need for sedation or physical restraint.                                                                                                                                |
| Yang et al. 2012 (70)    | Delirious general hospital patients received either flexible dosing risperidone alone or flexible dosing risperidone plus one hour of bright light exposure by a light box with an intensity of 10,000 lux daily (7 AM - 8 AM) for five days. | Geriatric (mean age=69.6) delirious hospitalized medical and surgical patients.                                                                                             | Risperidone alone (N) = 16<br>Risperidone with bright light therapy (N) = 20 | Randomized, open label, parallel single arm trial. Fixed dosing regimen.                    | 1. Baseline DRS scores higher for the risperidone only group compared to the risperidone + bright light therapy group.<br>2. Trend level baseline MDAS scores higher for the risperidone only group compared to the risperidone + bright light therapy group.<br>3. Baseline sleep efficiency (percent sleep of total bed time) better for the risperidone only group than the risperidone + bright light therapy group. | DSM-IV                         | NA                             | Not reported                                   | DRS and MDAS                           | More rapid decrease in delirium symptom severity scores for the risperidone + bright light group compared to the risperidone alone group. (Reflected in DRS total scores over time, but not in MDAS scores), p<.05). | Greater improvement in sleep efficiency in the risperidone + bright light therapy group compared to the risperidone alone group, data not provided, p=.002.                                                                                                                                |
| Hudetz et al. 2009 (38)  | Patients undergoing cardiac surgery with cardiopulmonary bypass received single IV dose of either ketamine (0.5 mg/kg) or placebo (0.9% saline) during anesthetic induction.                                                                  | Male geriatric patients (mean age=64) undergoing elective CABG or valve repair/replacement with cardiopulmonary bypass. Baseline prevalence rates of delirium not reported. | Placebo (N) = 29<br>Ketamine (N) = 29                                        | Randomized, double blind, placebo controlled, parallel two arm trial. Fixed dosing regimen. | No                                                                                                                                                                                                                                                                                                                                                                                                                       | ICDSC≥4                        | No risk prediction model used  | Not reported                                   | ICDSC                                  | Lower proportion of ketamine treated subjects diagnosed with post-operative delirium compared to placebo (3.4% vs. 31%), p<0.01.                                                                                     | 1. No differences in ICU LOS.<br>2. No differences in total hospital LOS.<br>3. No differences in time to extubation.<br>4. Smaller proportion ketamine treated subjects re-admitted to the hospital during a 30 day post-operative follow-up compared to placebo (6.9% vs. 27.6%), p<.05. |

| Study                   | Intervention                                                                                                                                                                                                                                                                                                                | Study Subjects                                                                             | Number of Subjects Randomized And Received Intervention | Study Design                                                                                                                                                                                                                                 | Intervention Group Imbalances                                                                                                                                                                                                                                                                                                                                                                                                                    | Method for Diagnosing Delirium | Delirium Risk Prediction Model                                                                                                                                                            | How Delirium Episode Resolution Was Determined | Method for Assessing Delirium Severity | Delirium Specific Outcomes                                                                                                                                                                                                                               | Delirium Non-Specific Outcomes                                                                                                                                                            |
|-------------------------|-----------------------------------------------------------------------------------------------------------------------------------------------------------------------------------------------------------------------------------------------------------------------------------------------------------------------------|--------------------------------------------------------------------------------------------|---------------------------------------------------------|----------------------------------------------------------------------------------------------------------------------------------------------------------------------------------------------------------------------------------------------|--------------------------------------------------------------------------------------------------------------------------------------------------------------------------------------------------------------------------------------------------------------------------------------------------------------------------------------------------------------------------------------------------------------------------------------------------|--------------------------------|-------------------------------------------------------------------------------------------------------------------------------------------------------------------------------------------|------------------------------------------------|----------------------------------------|----------------------------------------------------------------------------------------------------------------------------------------------------------------------------------------------------------------------------------------------------------|-------------------------------------------------------------------------------------------------------------------------------------------------------------------------------------------|
| Sieber et al. 2010 (37) | Patients undergoing hip fracture repair under spinal anesthesia received either intraoperative propofol-based light sedation or propofol-based deep sedation. Bispectral index (BIS) monitoring of the electroencephalogram was used to assess the depth of sedation. Deep sedation BIS = 50, light sedation BIS $\geq$ 80. | Geriatric patients (age>65) without pre-operative delirium undergoing hip fracture repair. | Deep sedation (N) = 57<br>Light sedation (N) = 57       | Randomized, double blind, parallel two arm, active comparator trial. Randomization stratified for age (>80 years or 65-80 years) and cognitive impairment (MMSE score, 24-30 or 15-23). Flexible dosing regimen according to sedation depth. | <ol style="list-style-type: none"> <li>1. Longer mean duration of surgery for the deep sedation group compared to the light sedation group.</li> <li>2. Greater proportion of subjects in the light sedation group receiving intra-operative midazolam compared to the deep sedation group.</li> <li>3. When intra-operative midazolam was given the light sedation group received a higher dose compared to the deep sedation group.</li> </ol> | CAM                            | Subject selection not based a priori delirium risk assignment. Post hoc analysis demonstrated an Inouye (1993;1996) median risk = 2 points (intermediate risk) for both treatment groups. | Not reported.                                  | Not reported                           | <ol style="list-style-type: none"> <li>1. Lower incidence of post-operative delirium in in the light sedation group compared to the deep sedation group (19% vs. 40%), p&lt;.05.</li> <li>2. No differences in duration of delirium episodes.</li> </ol> | <ol style="list-style-type: none"> <li>1. No differences in ICU LOS.</li> <li>2. No differences in total hospital LOS.</li> <li>3. No differences in hospital mortality rates.</li> </ol> |

## References

1. Inouye SK, Viscoli CM, Horwitz RI, Hurst LD, Tinetti ME: A predictive model for delirium in hospitalized elderly medical patients based on admission characteristics. *Ann Intern Med* 1993; 119:474–481
2. Inouye SK, Charpentier PA: Precipitating factors for delirium in hospitalized elderly persons: predictive model and interrelationship with baseline vulnerability. *JAMA* 1996; 275:852–857
3. Inouye SK, Bogardus ST Jr, Charpentier PA, Leo-Summers L, Acampora D, Holford TR, Cooney LM Jr: A multicomponent intervention to prevent delirium in hospitalized older patients. *N Engl J Med* 1999; 340:669–676
4. Liberati A, Altman DG, Tetzlaff J, Mulrow C, Gøtzsche PC, Ioannidis JP, Clarke M, Devereaux PJ, Kleijnen J, Moher D: The PRISMA statement for reporting systematic reviews and meta-analyses of studies that evaluate healthcare interventions: explanation and elaboration. *BMJ* 2009; 339:b2700
5. Wang W, Li HL, Wang DX, Zhu X, Li SL, Yao GQ, Chen KS, Gu XE, Zhu SN: Haloperidol prophylaxis decreases delirium incidence in elderly patients after noncardiac surgery: a randomized controlled trial. *Crit Care Med* 2012; 40:731–739
6. Kaneko T, Cai J: Ishikura. Kaneko T, Cai J, Ishikura T, Kobayashi M: Prophylactic consecutive administration of haloperidol can reduce the occurrence of postoperative delirium in gastrointestinal surgery. *Yonago Acta Med* 1999; 42:179–184
7. Kalisvaart KJ, de Jonghe JF, Bogaards MJ, Vreeswijk R, Egberts TC, Burger BJ, Eikelenboom P, van Gool WA: Haloperidol prophylaxis for elderly hip-surgery patients at risk for delirium: a randomized placebo-controlled study. *J Am Geriatr Soc* 2005; 53:1658–1666
8. Prakanrattana U, Prapaitrakool S: Efficacy of risperidone for prevention of postoperative delirium in cardiac surgery. *Anaesth Intensive Care* 2007; 35:714–719
9. Hakim SM, Othman AI, Naoum DO: Early treatment with risperidone for subsyndromal delirium after on-pump cardiac surgery in the elderly: a randomized trial. *Anesthesiology* 2012; 116:987–997
10. Larsen KA, Kelly SE, Stern TA, Bode RH Jr, Price LL, Hunter DJ, Gulczynski D, Bierbaum BE, Sweeney GA, Hoikala KA, Cotter JJ, Potter AW: Administration of olanzapine to prevent postoperative delirium in elderly joint-replacement patients: a randomized, controlled trial. *Psychosomatics* 2010; 51:409–418
11. Girard TD, Pandharipande PP, Carson SS, Schmidt GA, Wright PE, Canonico AE, Pun BT, Thompson JL, Shintani AK, Meltzer HY, Bernard GR, Dittus RS, Ely EW; MIND Trial Investigators: Feasibility, efficacy, and safety of antipsychotics for intensive care unit delirium: the MIND randomized, placebo-controlled trial. *Crit Care Med* 2010; 38:428–437

12. Boettger S, Friedlander M, Breitbart W, Passik S: Aripiprazole and haloperidol in the treatment of delirium. *Aust NZ J Psychiatry* 2011; 45:477–482
13. Skrobik YK, Bergeron N, Dumont M, Gottfried SB: Olanzapine vs haloperidol: treating delirium in a critical care setting. *Intensive Care Med* 2004; 30:444–449
14. Sipahimalani A, Masand PS: Olanzapine in the treatment of delirium. *Psychosomatics* 1998; 39:422–430
15. Kim SW, Yoo JA, Lee SY, Kim SY, Bae KY, Yang SJ, Kim JM, Shin IS, Yoon JS: Risperidone versus olanzapine for the treatment of delirium. *Hum Psychopharmacol* 2010; 25:298–302
16. Devlin JW, Roberts RJ, Fong JJ, Skrobik Y, Riker RR, Hill NS, Robbins T, Garpestad E: Efficacy and safety of quetiapine in critically ill patients with delirium: a prospective, multicenter, randomized, double-blind, placebo-controlled pilot study. *Crit Care Med* 2010; 38:419–427
17. Pae CU, Lee SJ, Lee CU, Lee C, Paik IH: A pilot trial of quetiapine for the treatment of patients with delirium. *Hum Psychopharmacol* 2004; 19:125–127
18. Kim KY, Bader GM, Kotlyar V, Gropper D: Treatment of delirium in older adults with quetiapine. *J Geriatr Psychiatry Neurol* 2003; 16:29–31
19. Breitbart W, Tremblay A, Gibson C: An open trial of olanzapine for the treatment of delirium in hospitalized cancer patients. *Psychosomatics* 2002; 43:175–182
20. Reade MC, O'Sullivan K, Bates S, Goldsmith D, Ainslie WR, Bellomo R: Dexmedetomidine vs. haloperidol in delirious, agitated, intubated patients: a randomised open-label trial. *Crit Care* 2009; 13:R75
21. Liptzin B, Laki A, Garb JL, Fingerroth R, Krushell R: Donepezil in the prevention and treatment of post-surgical delirium. *Am J Geriatr Psychiatry* 2005; 13:1100–1106
22. Sampson EL, Raven PR, Ndhlovu PN, Vallance A, Garlick N, Watts J, Blanchard MR, Bruce A, Blizard R, Ritchie CW: A randomized, double-blind, placebo-controlled trial of donepezil hydrochloride (Aricept) for reducing the incidence of postoperative delirium after elective total hip replacement. *Int J Geriatr Psychiatry* 2007; 22:343–349
23. Marcantonio ER, Palihnich K, Appleton P, Davis RB: Pilot randomized trial of donepezil hydrochloride for delirium after hip fracture. *J Am Geriatr Soc* 2011; 59(suppl 2):S282–S288
24. Zaslavsky A, Haile M, Kline R, Iospa A, Frempong-Boadu A, Bekker A: Rivastigmine in the treatment of postoperative delirium: a pilot clinical trial. *Int J Geriatr Psychiatry* 2012; 27:986–988
25. Gamberini M, Bolliger D, Lurati Buse GA, Burkhart CS, Grapow M, Gagneux A, Filipovic M, Seeberger MD, Pargger H, Siegemund M, Carrel T, Seiler WO, Berres M, Strebel SP,

- Monsch AU, Steiner LA: Rivastigmine for the prevention of postoperative delirium in elderly patients undergoing elective cardiac surgery—a randomized controlled trial. *Crit Care Med* 2009; 37:1762–1768
26. Berggren D, Gustafson Y, Eriksson B, Bucht G, Hansson LI, Reiz S, Winblad B: Postoperative confusion after anesthesia in elderly patients with femoral neck fractures. *Anesth Analg* 1987; 66:497–504
27. Papaioannou A, Fraidakis O, Michaloudis D, Balalis C, Askitopoulou H: The impact of the type of anaesthesia on cognitive status and delirium during the first postoperative days in elderly patients. *Eur J Anaesthesiol* 2005; 22:492–499
28. Beaussier M, Weickmans H, Parc Y, Delpierre E, Camus Y, Funck-Brentano C, Schiffer E, Delva E, Lienhart A: Postoperative analgesia and recovery course after major colorectal surgery in elderly patients: a randomized comparison between intrathecal morphine and intravenous PCA morphine. *Reg Anesth Pain Med* 2006; 31:531–538
29. Mouzopoulos G, Vasiliadis G, Lasanianos N, Nikolaras G, Morakis E, Kaminaris M: Fascia iliaca block prophylaxis for hip fracture patients at risk for delirium: a randomized placebo-controlled study. *J Orthop Traumatol* 2009; 10:127–133
30. Leung JM, Sands LP, Rico M, Petersen KL, Rowbotham MC, Dahl JB, Ames C, Chou D, Weinstein P: Pilot clinical trial of gabapentin to decrease postoperative delirium in older patients. *Neurology* 2006; 67:1251–1253
31. Riker RR, Shehabi Y, Bokesch PM, Ceraso D, Wisemandle W, Koura F, Whitten P, Margolis BD, Byrne DW, Ely EW, Rocha MG; SEDCOM (Safety and Efficacy of Dexmedetomidine Compared With Midazolam) Study Group: Dexmedetomidine vs midazolam for sedation of critically ill patients: a randomized trial. *JAMA* 2009; 301:489–499
32. Maldonado JR, Wysong A, van der Starre PJ, Block T, Miller C, Reitz BA: Dexmedetomidine and the reduction of postoperative delirium after cardiac surgery. *Psychosomatics* 2009; 50:206–217
33. Pandharipande PP, Pun BT, Herr DL, Maze M, Girard TD, Miller RR, Shintani AK, Thompson JL, Jackson JC, Deppen SA, Stiles RA, Dittus RS, Bernard GR, Ely EW: Effect of sedation with dexmedetomidine vs lorazepam on acute brain dysfunction in mechanically ventilated patients: the MENDS randomized controlled trial. *JAMA* 2007; 298:2644–2653
34. Shehabi Y, Grant P, Wolfenden H, Hammond N, Bass F, Campbell M, Chen J: Prevalence of delirium with dexmedetomidine compared with morphine based therapy after cardiac surgery: a randomized controlled trial (DEXmedetomidine Compared to Morphine–DEXCOM Study). *Anesthesiology* 2009; 111:1075–1084
35. Dubois MJ, Bergeron N, Dumont M, Dial S, Skrobik Y: Delirium in an intensive care unit: a study of risk factors. *Intensive Care Med* 2001; 27:1297–1304



36. Ersek M, Cherrier MM, Overman SS, Irving GA: The cognitive effects of opioids. *Pain Manag Nurs* 2004; 5:75–93
37. Sieber FE, Zakriya KJ, Gottschalk A, Blute MR, Lee HB, Rosenberg PB, Mears SC: Sedation depth during spinal anesthesia and the development of postoperative delirium in elderly patients undergoing hip fracture repair. *Mayo Clin Proc* 2010; 85:18–26; correction, 2010; 85:400
38. Hudetz JA, Patterson KM, Iqbal Z, Gandhi SD, Byrne AJ, Hudetz AG, Warltier DC, Pagel PS: Ketamine attenuates delirium after cardiac surgery with cardiopulmonary bypass. *J Cardiothorac Vasc Anesth* 2009; 23:651–657
39. Al-Aama T, Brymer C, Gutmanis I, Woolmore-Goodwin SM, Esbaugh J, Dasgupta M: Melatonin decreases delirium in elderly patients: a randomized, placebo-controlled trial. *Int J Geriatr Psychiatry* 2011; 26:687–694
40. Tahir TA, Eeles E, Karapareddy V, Muthuvelu P, Chapple S, Phillips B, Adyemo T, Farewell D, Bisson JI: A randomized controlled trial of quetiapine versus placebo in the treatment of delirium. *J Psychosom Res* 2010; 69:485–490
41. Grover S, Kumar V, Chakrabarti S: Comparative efficacy study of haloperidol, olanzapine and risperidone in delirium. *J Psychosom Res* 2011; 71:277–281
42. Han CS, Kim YK: A double-blind trial of risperidone and haloperidol for the treatment of delirium. *Psychosomatics* 2004; 45:297–301
43. Lee KU, Won WY, Lee HK, Kweon YS, Lee CT, Pae CU, Bahk WM: Amisulpride versus quetiapine for the treatment of delirium: a randomized, open prospective study. *Int Clin Psychopharmacol* 2005; 20:311–314
44. Breitbart W, Marotta R, Platt MM, Weisman H, Derevenco M, Grau C, Corbera K, Raymond S, Lund S, Jacobson P: A double-blind trial of haloperidol, chlorpromazine, and lorazepam in the treatment of delirium in hospitalized AIDS patients. *Am J Psychiatry* 1996; 153:231–237
45. van Eijk MM, Roes KC, Honing ML, Kuiper MA, Karakus A, van der Jagt M, Spronk PE, van Gool WA, van der Mast RC, Kesecioglu J, Slooter AJ: Effect of rivastigmine as an adjunct to usual care with haloperidol on duration of delirium and mortality in critically ill patients: a multicentre, double-blind, placebo-controlled randomised trial. *Lancet* 2010; 376:1829–1837
46. Zhang Z, Pan L, Ni H: Impact of delirium on clinical outcome in critically ill patients: a meta-analysis. *Gen Hosp Psychiatry* 2013; 35:105–111
47. Jackson JC, Gordon SM, Hart RP, Hopkins RO, Ely EW: The association between delirium and cognitive decline: a review of the empirical literature. *Neuropsychol Rev* 2004; 14:87–98

48. MacLulich AM, Beaglehole A, Hall RJ, Meagher DJ: Delirium and long-term cognitive impairment. *Int Rev Psychiatry* 2009; 21:30–42
49. Lundström M, Edlund A, Bucht G, Karlsson S, Gustafson Y: Dementia after delirium in patients with femoral neck fractures. *J Am Geriatr Soc* 2003; 51:1002–1006
50. Morandi A, Rogers BP, Gunther ML, Merkle K, Pandharipande P, Girard TD, Jackson JC, Thompson J, Shintani AK, Geevarghese S, Miller RR 3rd, Canonico A, Cannistraci CJ, Gore JC, Ely EW, Hopkins RO; VISIONS Investigation, VISualizing Icu SurvivOrs Neuroradiological Sequelae: The relationship between delirium duration, white matter integrity, and cognitive impairment in intensive care unit survivors as determined by diffusion tensor imaging: the VISIONS prospective cohort magnetic resonance imaging study. *Crit Care Med* 2012; 40:2182–2189
51. Gunther ML, Morandi A, Krauskopf E, Pandharipande P, Girard TD, Jackson JC, Thompson J, Shintani AK, Geevarghese S, Miller RR 3rd, Canonico A, Merkle K, Cannistraci CJ, Rogers BP, Gatenby JC, Heckers S, Gore JC, Hopkins RO, Ely EW; VISIONS Investigation, VISualizing Icu SurvivOrs Neuroradiological Sequelae: The association between brain volumes, delirium duration, and cognitive outcomes in intensive care unit survivors: the VISIONS cohort magnetic resonance imaging study. *Crit Care Med* 2012; 40:2022–2032
52. Girard TD, Jackson JC, Pandharipande PP, Pun BT, Thompson JL, Shintani AK, Gordon SM, Canonico AE, Dittus RS, Bernard GR, Ely EW: Delirium as a predictor of long-term cognitive impairment in survivors of critical illness. *Crit Care Med* 2010b; 38:1513–1520
53. Neufeld KJ, Leoutsakos JM, Sieber FE, Wanamaker BL, Gibson Chambers JJ, Rao V, Schretlen DJ, Needham DM: Outcomes of early delirium diagnosis after general anesthesia in the elderly. *Anesth Analg* 2013; 117:471–478
54. Meagher D, Adamis D, Trzepacz P, Leonard M: Features of subsyndromal and persistent delirium. *Br J Psychiatry* 2012; 200:37–44
55. Marcantonio ER, Kiely DK, Simon SE, John Orav E, Jones RN, Murphy KM, Bergmann MA: Outcomes of older people admitted to postacute facilities with delirium. *J Am Geriatr Soc* 2005; 53:963–969
56. Cole M, McCusker J, Dendukuri N, Han L: The prognostic significance of subsyndromal delirium in elderly medical inpatients. *J Am Geriatr Soc* 2003; 51:754–760
57. Lawlor P, Gagnon B, Mancini IL, Pereira J, Bruera E: Phenomenology of delirium and its subtypes in advanced cancer patients: a prospective study (abstract). *Palliat Care* 1998; 14:106
58. Webster R, Holroyd S: Prevalence of psychotic symptoms in delirium. *Psychosomatics* 2000; 41:519–522
59. Liptzin B, Levkoff SE: An empirical study of delirium subtypes. *Br J Psychiatry* 1992; 161:843–845

60. Inouye SK: The dilemma of delirium: clinical and research controversies regarding diagnosis and evaluation of delirium in hospitalized elderly medical patients. *Am J Med* 1994; 97:278–288
61. American Psychiatric Association: Practice Guideline for the Treatment of Patients With Delirium. *Am J Psychiatry* 1999; 156(May suppl):1–20
62. National Institute for Health and Clinical Excellence: Delirium: Diagnosis, Prevention and Management: Clinical Guideline 103. <http://guidance.nice.org.uk/CG103>.
63. Clinical Epidemiology and Health Service Evaluation Unit, Victoria, Australia: Clinical Practice Guidelines for the Management of Delirium in Older People, October 2006. <http://docs.health.vic.gov.au/docs/doc/Clinical-Practice-Guidelines-for-the-Management-of-Delirium-in-Older-People---October-2006>
64. O’Keeffe ST: Clinical subtypes of delirium in the elderly. *Dement Geriatr Cogn Disord* 1999; 10:380–385
65. Platt MM, Breitbart W, Smith M, Marotta R, Weisman H, Jacobsen PB: Efficacy of neuroleptics for hypoactive delirium. *J Neuropsychiatry Clin Neurosci* 1994; 6:66–67
66. Vochteloo AJ, Moerman S, van der Burg BL, de Boo M, de Vries MR, Niesten DD, Tuinebreijer WE, Nelissen RG, Pilot P: Delirium risk screening and haloperidol prophylaxis program in hip fracture patients is a helpful tool in identifying high-risk patients, but does not reduce the incidence of delirium. *BMC Geriatr* 2011; 11:39
67. Kishi Y, Kato M, Okuyama T, Thurber S: Treatment of delirium with risperidone in cancer patients. *Psychiatry Clin Neurosci* 2012; 66:411–417
68. Sasaki Y, Matsuyama T, Inoue S, Sunami T, Inoue T, Denda K, Koyama T: A prospective, open-label, flexible-dose study of quetiapine in the treatment of delirium. *J Clin Psychiatry* 2003; 64:1316–1321
69. Parellada E, Baeza I, de Pablo J, Martínez G: Risperidone in the treatment of patients with delirium. *J Clin Psychiatry* 2004; 65:348–353
70. Yang J, Choi W, Ko YH, Joe SH, Han C, Kim YK: Bright light therapy as an adjunctive treatment with risperidone in patients with delirium: a randomized, open, parallel group study. *Gen Hosp Psychiatry* 2012; 34:546–551
71. American Psychiatric Association: Diagnostic and Statistical Manual of Mental Disorders, 4th ed. Washington, DC, American Psychiatric Association, 1994
72. Ely EW, Inouye SK, Bernard GR, Gordon S, Francis J, May L, Truman B, Speroff T, Gautam S, Margolin R, Hart RP, Dittus R: Delirium in mechanically ventilated patients: validity and reliability of the Confusion Assessment Method for the Intensive Care Unit (CAM-ICU). *JAMA* 2001; 286:2703–2710

73. American Psychiatric Association: Diagnostic and Statistical Manual of Mental Disorders, 3rd ed, revised. Washington, DC, American Psychiatric Association, 1987
74. Trzepacz PT, Mittal D, Torres R, Kanary K, Norton J, Jimerson N: Validation of the Delirium Rating Scale-Revised-98: comparison with the Delirium Rating Scale and the Cognitive Test for Delirium. *J Neuropsychiatry Clin Neurosci* 2001; 13:229–242
75. Inouye SK, van Dyck CH, Alessi CA, Balkin S, Siegel AP, Horwitz RI: Clarifying confusion: the confusion assessment method: a new method for detection of delirium. *Ann Intern Med* 1990; 113:941–948
76. Bergeron N, Dubois MJ, Dumont M, Dial S, Skrobik Y: Intensive Care Delirium Screening Checklist: evaluation of a new screening tool. *Intensive Care Med* 2001; 27:859–864
77. Yates JW, Chalmer B, McKegney FP: Evaluation of patients with advanced cancer using the Karnofsky performance status. *Cancer* 1980; 45:2220–2224
78. American Psychiatric Association: Diagnostic and statistical manual of mental disorders, 4th ed, text rev. Washington, DC, American Psychiatric Association, 2000
79. Trzepacz PT, Baker RW, Greenhouse J: A symptom rating scale for delirium. *Psychiatry Res* 1988; 23:89–97
80. Breitbart W, Rosenfeld B, Roth A, Smith MJ, Cohen K, Passik S: The Memorial Delirium Assessment Scale. *J Pain Symptom Manage* 1997; 13:128–137
81. McCusker J, Cole M, Bellavance F, Primeau F: Reliability and validity of a new measure of severity of delirium. *Int Psychogeriatr* 1998; 10:421–433
82. Kato M, Kishi Y, Okuyama T, Trzepacz PT, Hosaka T: Japanese version of the Delirium Rating Scale, Revised-98 (DRS-R98-J): reliability and validity. *Psychosomatics* 2010; 51:425–431
83. Albert MS, Levkoff SE, Reilly C, Liptzin B, Pilgrim D, Cleary PD, Evans D, Rowe JW: The delirium symptom interview: an interview for the detection of delirium symptoms in hospitalized patients. *J Geriatr Psychiatry Neurol* 1992; 5:14–21
84. American Psychiatric Association: Diagnostic and Statistical Manual of Mental Disorders, 3rd ed. Washington, DC, American Psychiatric Association, 1980
85. Sessler CN, Gosnell MS, Grap MJ, Brophy GM, O’Neal PV, Keane KA, Tesoro EP, Elswick RK: The Richmond Agitation-Sedation Scale: validity and reliability in adult intensive care unit patients. *Am J Respir Crit Care Med* 2002; 166:1338–1344
